# Supplementary material for: Ring stacking and laddering in ammonium carboxylate salts: extension to secondary ammonium salts
Source: Royal Society of Chemistry journal article supplement (doi:10.1039/d0ce00616e), 2020-01-01
Supplement: d0ce00616e1.pdf [file d0ce00616e1.pdf]

## Ring stacking and laddering in ammonium carboxylate salts: extension to secondary ammonium salts

James A. Odendal, Jocelyn C. Bruce, Klaus R. Koch<sup>†</sup> and Delia A. Haynes\*

Department of Chemistry & Polymer Science, Stellenbosch University, P. Bag X1, Matieland, 7602, Stellenbosch, South Africa. E-mail: dhaynes@sun.ac.za

### Supplementary Information

#### Contents

|                              |        |
|------------------------------|--------|
| Hydrogen bond parameters     | page 1 |
| Crystallographic details     | page 2 |
| Thermal analysis             | page 3 |
| Electrostatic potential maps | page 3 |
| Refcode lists                | page 4 |

Table S1. Hydrogen bond parameters in salts 1-7.

| Salt | N <sup>+</sup> ...O <sup>-</sup> distance /Å | Symmetry operator | N <sup>+</sup> H O <sup>-</sup> angle /° |
|------|----------------------------------------------|-------------------|------------------------------------------|
| 1    | 2.727(1)                                     | x,y,z             | 179(2)                                   |
|      | 2.709(1)                                     | x,1/2-y,-1/2+z    | 173(1)                                   |
| 2    | 2.760(4)                                     | x,y,z             | 162(4)                                   |
|      | 2.713(5)                                     | x,y,z             | 176.0                                    |
|      | 2.773(4)                                     | x,y,z             | 176.9                                    |
|      | 2.737(5)                                     | x,1+y,z           | 174(4)                                   |
| 3    | 2.726(2)                                     | x,y,z             | 155(2)                                   |
|      | 2.678(2)                                     | 1-x,1-y,-z        | 177(2)                                   |
| 4    | 2.711(1)                                     | x,y,z             | 165(1)                                   |
|      | 2.710(1)                                     | 1/2-x,1/2-y,-z    | 166(1)                                   |
| 5    | 2.970(2)                                     | x,y,z             | 144(2)                                   |
|      | 2.979(2)                                     | x,y,z             | 156(2)                                   |
|      | 2.744(2)                                     | 1+x,y,z           | 170(2)                                   |
| 6    | 2.708(2)                                     | x,y,z             | 173(3)                                   |
|      | 2.688(2)                                     | 1+x,y,z           | 172(2)                                   |
| 7    | 2.765(3)                                     | x,y,z             | 173(3)                                   |
|      | 2.719(3)                                     | 1+x,y,z           | 173(3)                                   |

<sup>†</sup> Deceased 2 January 2020.

**Table S2. Selected crystallographic data for salts 1-7.**

| Structure number                                    | 1                                                                                                                   | 2                                                                                                        | 3                                                                                                                              | 4                                                                                                                | 5                                                                                                              | 6                                                                                                                             | 7                                                                                                                                |
|-----------------------------------------------------|---------------------------------------------------------------------------------------------------------------------|----------------------------------------------------------------------------------------------------------|--------------------------------------------------------------------------------------------------------------------------------|------------------------------------------------------------------------------------------------------------------|----------------------------------------------------------------------------------------------------------------|-------------------------------------------------------------------------------------------------------------------------------|----------------------------------------------------------------------------------------------------------------------------------|
| Empirical formula                                   | C <sub>18</sub> H <sub>23</sub> NO <sub>2</sub>                                                                     | C <sub>22</sub> H <sub>31</sub> NO <sub>2</sub>                                                          | C <sub>20</sub> H <sub>35</sub> NO <sub>2</sub>                                                                                | C <sub>13</sub> H <sub>25</sub> NO <sub>2</sub>                                                                  | C <sub>13</sub> H <sub>29</sub> NO <sub>4</sub>                                                                | C <sub>20</sub> H <sub>31</sub> NO <sub>2</sub>                                                                               | C <sub>26</sub> H <sub>35</sub> NO <sub>2</sub>                                                                                  |
| Formula weight                                      | 285.37                                                                                                              | 341.48                                                                                                   | 321.49                                                                                                                         | 227.34                                                                                                           | 263.37                                                                                                         | 317.46                                                                                                                        | 393.55                                                                                                                           |
| Temperature (K)                                     | 100(2)                                                                                                              | 100(2)                                                                                                   | 100(2)                                                                                                                         | 100(2)                                                                                                           | 100(2)                                                                                                         | 100(2)                                                                                                                        | 100(2)                                                                                                                           |
| Wavelength (Å)                                      | 0.71073                                                                                                             | 0.71073                                                                                                  | 0.71073                                                                                                                        | 0.71073                                                                                                          | 0.71073                                                                                                        | 0.71073                                                                                                                       | 0.71073                                                                                                                          |
| Crystal system                                      | monoclinic                                                                                                          | orthorhombic                                                                                             | triclinic                                                                                                                      | monoclinic                                                                                                       | monoclinic                                                                                                     | triclinic                                                                                                                     | triclinic                                                                                                                        |
| Space group                                         | <i>P2<sub>1</sub>/c</i>                                                                                             | <i>Pca2<sub>1</sub></i>                                                                                  | <i>P-1</i>                                                                                                                     | <i>C2/c</i>                                                                                                      | <i>P2<sub>1</sub>/n</i>                                                                                        | <i>P-1</i>                                                                                                                    | <i>P1</i>                                                                                                                        |
| Unit cell dimensions (Å, °)                         | $a = 8.3067(7)$<br>$b = 16.4097(13)$<br>$c = 11.4319(9)$<br>$\alpha = 90$<br>$\beta = 96.3880(10)$<br>$\gamma = 90$ | $a = 21.610(3)$<br>$b = 8.5291(11)$<br>$c = 21.825(3)$<br>$\alpha = 90$<br>$\beta = 90$<br>$\gamma = 90$ | $a = 8.5570(14)$<br>$b = 9.8287(16)$<br>$c = 12.292(2)$<br>$\alpha = 77.147(3)$<br>$\beta = 75.054(3)$<br>$\gamma = 83.311(3)$ | $a = 19.216(3)$<br>$b = 8.1118(9)$<br>$c = 16.8987(19)$<br>$\alpha = 90$<br>$\beta = 94.372(4)$<br>$\gamma = 90$ | $a = 5.1775(7)$<br>$b = 17.585(2)$<br>$c = 16.534(2)$<br>$\alpha = 90$<br>$\beta = 95.783(2)$<br>$\gamma = 90$ | $a = 5.5919(10)$<br>$b = 10.782(2)$<br>$c = 15.271(3)$<br>$\alpha = 93.444(3)$<br>$\beta = 93.522(3)$<br>$\gamma = 94.507(3)$ | $a = 5.7270(7)$<br>$b = 9.4987(12)$<br>$c = 10.4310(13)$<br>$\alpha = 95.286(2)$<br>$\beta = 90.783(2)$<br>$\gamma = 103.644(2)$ |
| Volume (Å <sup>3</sup> )                            | 1548.6(2)                                                                                                           | 4022.6(9)                                                                                                | 971.9(3)                                                                                                                       | 2626.4(5)                                                                                                        | 1497.7(3)                                                                                                      | 914.2(3)                                                                                                                      | 548.71(12)                                                                                                                       |
| Z                                                   | 4                                                                                                                   | 8                                                                                                        | 2                                                                                                                              | 8                                                                                                                | 4                                                                                                              | 2                                                                                                                             | 1                                                                                                                                |
| Calculated density (g cm <sup>-3</sup> )            | 1.224                                                                                                               | 1.128                                                                                                    | 1.099                                                                                                                          | 1.15                                                                                                             | 1.168                                                                                                          | 1.153                                                                                                                         | 1.191                                                                                                                            |
| Absorption coefficient (mm <sup>-1</sup> )          | 0.079                                                                                                               | 0.071                                                                                                    | 0.069                                                                                                                          | 0.076                                                                                                            | 0.085                                                                                                          | 0.073                                                                                                                         | 0.074                                                                                                                            |
| <i>F</i> <sub>000</sub>                             | 616                                                                                                                 | 1488                                                                                                     | 356                                                                                                                            | 1008                                                                                                             | 584                                                                                                            | 348                                                                                                                           | 214                                                                                                                              |
| Crystal size (mm <sup>3</sup> )                     | 0.50 × 0.39 × 0.16                                                                                                  | 0.24 × 0.11 × 0.08                                                                                       | 0.47 × 0.10 × 0.10                                                                                                             | 0.60 × 0.51 × 0.45                                                                                               | 0.400 × 0.190 × 0.100                                                                                          | 1.05 × 0.52 × 0.26                                                                                                            | 0.20 × 0.10 × 0.03                                                                                                               |
| θ range for data collection (°)                     | 2.180 to 28.357                                                                                                     | 1.866 to 28.292                                                                                          | 1.750 to 28.278                                                                                                                | 2.126 to 28.305                                                                                                  | 1.695 to 28.267                                                                                                | 1.339 to 25.085                                                                                                               | 1.962 to 26.383                                                                                                                  |
| Miller index ranges                                 | -11 ≤ <i>h</i> ≤ 11, -20 ≤ <i>k</i> ≤ 20, -15 ≤ <i>l</i> ≤ 15                                                       | -25 ≤ <i>h</i> ≤ 27, -10 ≤ <i>k</i> ≤ 11, -29 ≤ <i>l</i> ≤ 15                                            | -11 ≤ <i>h</i> ≤ 11, -12 ≤ <i>k</i> ≤ 12, -16 ≤ <i>l</i> ≤ 16                                                                  | -25 ≤ <i>h</i> ≤ 21, -8 ≤ <i>k</i> ≤ 10, -22 ≤ <i>l</i> ≤ 17                                                     | -6 ≤ <i>h</i> ≤ 6, -22 ≤ <i>k</i> ≤ 22, -11 ≤ <i>l</i> ≤ 21                                                    | -6 ≤ <i>h</i> ≤ 6, -12 ≤ <i>k</i> ≤ 12, -18 ≤ <i>l</i> ≤ 18                                                                   | -7 ≤ <i>h</i> ≤ 7, -11 ≤ <i>k</i> ≤ 11, -13 ≤ <i>l</i> ≤ 13                                                                      |
| Reflections collected                               | 17669                                                                                                               | 23175                                                                                                    | 11235                                                                                                                          | 8059                                                                                                             | 9233                                                                                                           | 8842                                                                                                                          | 6017                                                                                                                             |
| Independent reflections                             | 3681 [ <i>R</i> <sub>int</sub> = 0.0332]                                                                            | 7928 [ <i>R</i> <sub>int</sub> = 0.0835]                                                                 | 4442 [ <i>R</i> <sub>int</sub> = 0.0343]                                                                                       | 3060 [ <i>R</i> <sub>int</sub> = 0.0267]                                                                         | 3496 [ <i>R</i> <sub>int</sub> = 0.0315]                                                                       | 3227 [ <i>R</i> <sub>int</sub> = 0.0281]                                                                                      | 4351 [ <i>R</i> <sub>int</sub> = 0.0185]                                                                                         |
| Completeness to θ <sub>max</sub> (%)                | 0.951                                                                                                               | 0.946                                                                                                    | 0.919                                                                                                                          | 0.936                                                                                                            | 0.944                                                                                                          | 0.994                                                                                                                         | 0.992                                                                                                                            |
| Max. and min. transmission                          | 0.9976 and 0.9994                                                                                                   | 0.9976 and 0.9994                                                                                        | 0.789 and 0.993                                                                                                                | 0.812 and 0.967                                                                                                  | 0.823 and 0.993                                                                                                | 0.738 and 0.981                                                                                                               | 0.860 and 0.998                                                                                                                  |
| Data / restraints / parameters                      | 3681 / 0 / 200                                                                                                      | 7928 / 1 / 463                                                                                           | 4442 / 0 / 218                                                                                                                 | 3060 / 0 / 153                                                                                                   | 3496 / 6 / 187                                                                                                 | 3227 / 0 / 216                                                                                                                | 4351 / 3 / 270                                                                                                                   |
| Goodness-of-fit on <i>F</i> <sup>2</sup>            | 1.032                                                                                                               | 1.057                                                                                                    | 1.09                                                                                                                           | 1.026                                                                                                            | 1.063                                                                                                          | 1.058                                                                                                                         | 0.952                                                                                                                            |
| Final <i>R</i> indices [ <i>I</i> > 2σ( <i>I</i> )] | <i>R</i> 1 = 0.0463, <i>wR</i> 2 = 0.1098                                                                           | <i>R</i> 1 = 0.0745, <i>wR</i> 2 = 0.1342                                                                | <i>R</i> 1 = 0.0620, <i>wR</i> 2 = 0.1324                                                                                      | <i>R</i> 1 = 0.0460, <i>wR</i> 2 = 0.1201                                                                        | <i>R</i> 1 = 0.0555, <i>wR</i> 2 = 0.1317                                                                      | <i>R</i> 1 = 0.0432, <i>wR</i> 2 = 0.1076                                                                                     | <i>R</i> 1 = 0.0440, <i>wR</i> 2 = 0.1161                                                                                        |
| <i>R</i> indices (all data)                         | <i>R</i> 1 = 0.0537, <i>wR</i> 2 = 0.1147                                                                           | <i>R</i> 1 = 0.1038, <i>wR</i> 2 = 0.1464                                                                | <i>R</i> 1 = 0.0865, <i>wR</i> 2 = 0.1426                                                                                      | <i>R</i> 1 = 0.0553, <i>wR</i> 2 = 0.1266                                                                        | <i>R</i> 1 = 0.0693, <i>wR</i> 2 = 0.1397                                                                      | <i>R</i> 1 = 0.0534, <i>wR</i> 2 = 0.1166                                                                                     | <i>R</i> 1 = 0.0464, <i>wR</i> 2 = 0.1188                                                                                        |
| Largest diff. peak and hole (e Å <sup>-3</sup> )    | 0.414 and -0.193                                                                                                    | 0.260 and -0.230                                                                                         | 0.299 and -0.231                                                                                                               | 0.403 and -0.174                                                                                                 | 0.382 and -0.180                                                                                               | 0.263 and -0.194                                                                                                              | 0.235 and -0.197                                                                                                                 |

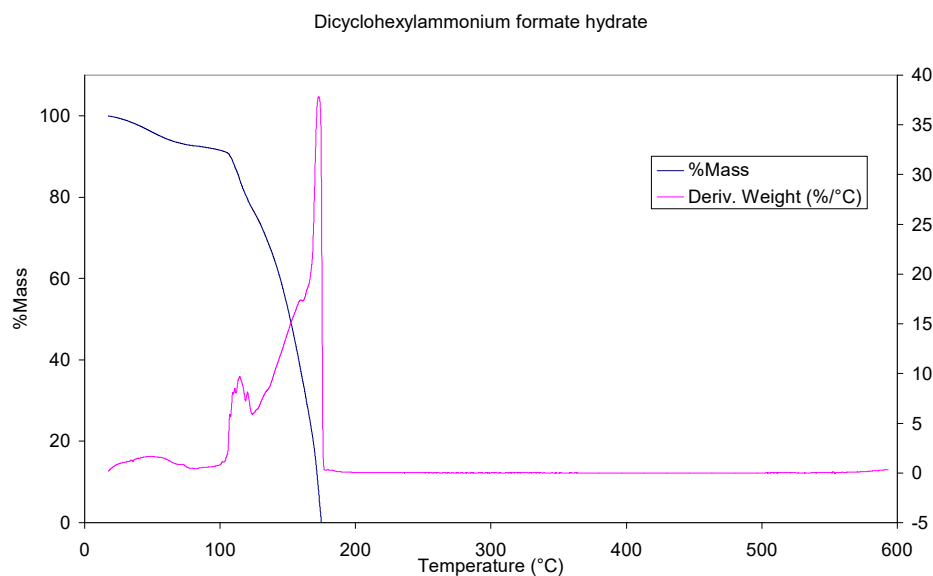

**Figure S1.** TGA of salt **5**. Observed mass loss is 10.27%, larger than the calculated mass loss of 6.83% for two waters, presumably due to surface solvent on the crystals.

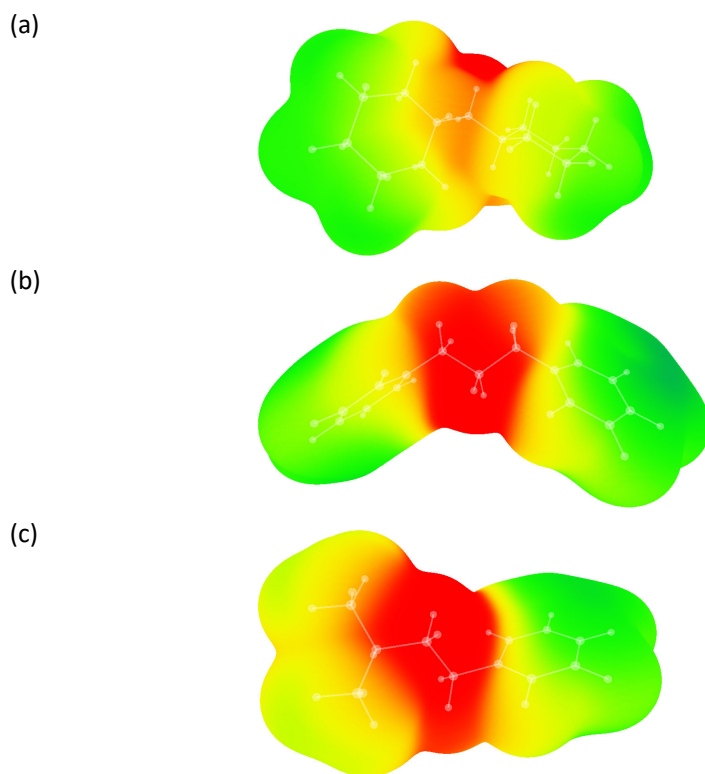

**Figure S2.** Electrostatic potential maps (0.01 a.u. isosurface) for the dicyclohexylammonium ion from (a) COBPEO and (b) PEQJEB, showing how the positive potential extends over the cation. Part (c) shows the electrostatic potential map for the N-benzylpropan-2-aminium cation from GEPNAT, demonstrating that this is not restricted to dicyclohexylammonium ions. Wavefunctions and ESPs were calculated using Gaussian09 v D.01.<sup>1</sup> Hydrogen atom positions were optimised, and the wavefunction calculated using population analysis at the B3LYP-D3/6-311++G(d,p) level of theory. ESPs were read from output files generated in Surface Analysis Suite using WFA, and graphics generated in SurRender.<sup>2</sup>

Refcode lists

**Secondary ammonium carboxylates (130 structures)**

|          |          |          |
|----------|----------|----------|
| ABADAK   | JAVDOC   | RATYER   |
| ABUQAR   | JAVNOM   | RATYIV   |
| AGAPOP   | JAVNUS   | RATYOB   |
| AKOGOY03 | JAVPEE   | RATYUH   |
| AWUQEP   | JAVPII   | RATZAO   |
| BEPTUN   | JEFYAV   | RATZES   |
| CADMAY   | JEFYEZ   | RATZIW   |
| CENXAX   | JEFYUP   | SAMLAU   |
| CENXIF   | JEFZIE   | SAWXEW   |
| CENXOL   | LESRIL   | SUQNOI   |
| CENXUR   | LIGZOR   | TIYFUE   |
| CENYEC   | MABVES   | UHOBIC   |
| CENYIG   | MAKJUG   | ULIMIM   |
| CENYOM   | MASQOM   | ULUPIA   |
| CEPFIP   | MATNUQ   | VITTAU   |
| CEPFUB   | MEVXUG   | VUKQOJ   |
| CEPGAI   | MEVYAN   | VUPTUW   |
| CINZIJ   | MEVYER   | VUXNAF   |
| COBPEO01 | MISXIW   | VUXNEJ   |
| ELIZAC   | MORPLN11 | VUXNIN   |
| ELIZEG   | NELTAZ   | VUXNOT   |
| EQEWII   | NENFES   | VUXVOB   |
| EVIHOH   | NUKDOO   | WUBHAC   |
| FAFLII   | PEDGIO   | XAFTAC   |
| FIWZUI   | PEQGEY   | XEBGOC   |
| GASCHA   | PEQGIC   | XIMBZA   |
| GEPNAT   | PEQGOI   | XIMBZB01 |
| GEPYAE   | PEQGUO   | XISWEE   |
| GIGDUX   | PEQHAV   | XONSUQ   |
| GISJIB   | PEQHEZ   | YEJYAN   |
| GIZCIC   | PEQHID   | YEJYER   |
| GODFUA   | PEQHOJ   | YIDJON   |
| HAPQEX02 | PEQHUP   | YUFREX   |
| ICOPAS   | PEQJAX   | ZANPOW   |
| IROVUI   | PEQJEB   | ZIVLUL   |
| JAMWIE   | PEQJIF   | ZUTFIF   |
| JAMWOK   | PEQJOL   |          |
| JAMWUQ   | PEQJUR   |          |
| JAMXAX   | PEQKAY   |          |
| JAMXEB   | PEQKEC   |          |
| JAMXIF   | PEQKIG   |          |
| JAMXUR   | PEZMUC   |          |
| JAMYAY   | PIPBBZ   |          |
| JAMYEC   | PIPCBZ01 |          |
| JAMYIG   | PIPTAC   |          |
| JAMYOM   | QUQJET   |          |
| JAMYUS   | RATYAN   |          |

**Discrete rings (55 structures)**

ABADAK  
AWUQEP  
CENYEC  
ELIZAC  
ELIZEG  
EVIHOH  
FAFLII  
GIGDUX  
GISJIB  
GIZCIC  
GODFUA  
JAMXIF  
JAMXUR  
JAMYAY  
JAMYEC  
JAMYIG  
JAMYOM  
JAMYUS  
JAVDOC  
JAVNUS  
JAVPEE  
JAVPII  
JEFYAV  
JEFYEZ  
JEFYUP  
LESRIL  
LIGZOR  
MABVES  
MATNUQ  
MEVYAN  
MEVYER  
MISXIW  
MORPLN11  
NELTAZ  
PEDGIO  
PEZMUC  
QUQJET  
RATYAN  
RATYER  
RATYIV  
RATYOB  
RATYUH  
RATZAO  
SAWXEW  
UHOBIC

**Ladders (9 structures)**

EQEWII  
PEQGIC  
PEQGOI  
PEQHAV  
VUXNAF  
VUXNEJ  
VUXVOB  
XAFTAC  
YUFREX

## 1D chains (66 structures, ladders with one long rung in bold)

|                 |                 |
|-----------------|-----------------|
| ABUQAR          | PEQGEY          |
| AGAPOP          | PEQGUO          |
| <b>AKOGOY03</b> | <b>PEQHEZ</b>   |
| <b>BEPTUN</b>   | <b>PEQHID</b>   |
| <b>CADMAY</b>   | <b>PEQHOJ</b>   |
| CENXAX          | <b>PEQHUP</b>   |
| <b>CENXIF</b>   | <b>PEQJAX</b>   |
| CENXOL          | <b>PEQJEB</b>   |
| <b>CENXUR</b>   | <b>PEQJIF</b>   |
| CENYIG          | <b>PEQJOL</b>   |
| CENYOM          | <b>PEQJUR</b>   |
| CEPFIP          | PEQKAY          |
| CEPFUB          | <b>PEQKEC</b>   |
| CEPGAI          | <b>PEQKIG</b>   |
| <b>CINZIJ</b>   | <b>PIPBBZ</b>   |
| COBPEO01        | <b>PIPCBZ01</b> |
| FIWZUI          | <b>PIPTAC</b>   |
| <b>GASCHA</b>   | RATZES          |
| <b>GEPNAT</b>   | RATZIW          |
| <b>GEPYAE</b>   | <b>SAMLAU</b>   |
| <b>HAPQEX02</b> | <b>SUQNOI</b>   |
| ICOPAS          | <b>TIYFUE</b>   |
| IROVUI          | <b>ULIMIM</b>   |
| JAMWIE          | <b>ULUPIA</b>   |
| JAMWOK          | <b>VITTAV</b>   |
| JAMWUQ          | VUKQOJ          |
| JAMXAX          | VUXNIN          |
| <b>JAMXEB</b>   | XIMBZA          |
| <b>JAVNOM</b>   | <b>XIMBZB01</b> |
| JEFZIE          | <b>XONSUQ</b>   |
| MAKJUG          | <b>ZANPOW</b>   |
| <b>MASQOM</b>   |                 |
| <b>MEVXUG</b>   |                 |
| NENFES          |                 |
| <b>NUKDOO</b>   |                 |

### References

1. Gaussian 09, Revision D.01, M. J. Frisch, G. W. Trucks, H. B. Schlegel, G. E. Scuseria, M. A. Robb, J. R. Cheeseman, G. Scalmani, V. Barone, G. A. Petersson, H. Nakatsuji, X. Li, M. Caricato, A. Marenich, J. Bloino, B. G. Janesko, R. Gomperts, B. Mennucci, H. P. Hratchian, J. V. Ortiz, A. F. Izmaylov, J. L. Sonnenberg, D. Williams-Young, F. Ding, F. Lipparini, F. Egidi, J. Goings, B. Peng, A. Petrone, T. Henderson, D. Ranasinghe, V. G. Zakrzewski, J. Gao, N. Rega, G. Zheng, W. Liang, M. Hada, M. Ehara, K. Toyota, R. Fukuda, J. Hasegawa, M. Ishida, T. Nakajima, Y. Honda, O. Kitao, H. Nakai, T. Vreven, K. Throssell, J. A. Montgomery, Jr., J. E. Peralta, F. Ogliaro, M. Bearpark, J. J. Heyd, E. Brothers, K. N. Kudin, V. N. Staroverov, T. Keith, R. Kobayashi, J. Normand, K. Raghavachari, A. Rendell, J. C. Burant, S. S. Iyengar, J. Tomasi, M. Cossi, J. M. Millam, M. Klene, C. Adamo, R. Cammi, J. W. Ochterski, R. L. Martin, K. Morokuma, O. Farkas, J. B. Foresman, and D. J. Fox, Gaussian, Inc., Wallingford CT, 2016.
2. (a) F. A. Bulat and A. Toro-Labbe, 'WFA: A suite of programs to analyse wavefunctions', unpublished; (b) F. A. Bulat, A. Toro-Labbe, T. Brinck, J. S. Murray and P. Politzer, *J. Mol. Modeling*, 2010, **16**,1679-1691.
